# Supplementary material for: The Effect of the Menstrual Cycle and Oral Contraceptive Cycle on Muscle Performance and Perceptual Measures
Source: MDPI journal article supplement (doi:10.3390/ijerph182010565), 2021-10-09
Supplement: s1 [file s1]

**Supplementary File: Combined Monophasic Oral Contraceptive Formulations**

| Trade Name        | Number of<br>Participants | Ethinyl Estradiol<br>Dose (mg) | Progestin Type | Progestin Dose<br>(mg) | Androgenicity     |
|-------------------|---------------------------|--------------------------------|----------------|------------------------|-------------------|
| Brenda® 35 ED     | 3                         | 0.035                          | Cyproterone    | 2.00                   | NA <sup>#</sup>   |
| Brevinor®         | 1                         | 0.035                          | Norethindrone  | 0.50                   | 0.5               |
| Diane® 35 ED      | 1                         | 0.035                          | Cyproterone    | 2.00                   | NA <sup>#</sup>   |
| Levlen® ED        | 7                         | 0.030                          | Levonorgestrel | 0.15                   | 1.25 <sup>*</sup> |
| Micronelle® 30 ED | 2                         | 0.030                          | Levonorgestrel | 0.15                   | 1.25 <sup>*</sup> |
| Monofeme®         | 1                         | 0.030                          | Levonorgestrel | 0.15                   | 1.25 <sup>*</sup> |
| Norimin-1®        | 2                         | 0.035                          | Norethindrone  | 0.50                   | 0.5               |
| Reclipsen®        | 1                         | 0.030                          | Desogestrel    | 0.15                   | 0.51              |

Progestin potency and androgenicity calculated by method of Greer et al. (2005)

\* OC with high androgenicity ( $\geq 1.0$ )

<sup>#</sup> Anti-androgen so no androgenicity values, classified in low androgenicity group
